# Supplementary material
Source: publisher site journal article supplement (https://www.dovepress.com/article/250367)
Supplement: Supplementary file 1 [file get_supplementary_file.php]

Supplementary Table.1 Primer sequence

| Gene | Forward (5’-3’) | Reverse (5’-3’) |
| --- | --- | --- |
| Mouse *Mt1* | TCCAACGACTATAAAGAGGG | GGAGTAAGTGAGGAGAAGG |
| Mouse *Mt2* | AACAATGCAAATGTACTTCCT | GAAGCCTCTTTGCAGATG |
| Mouse *Mt3* | TGGATATGGACCCTGAGA | CAGCTCTTCTTGCAGTTC |
| Mouse *Mt4* | CTACACAGTACCTGAGTCAA | AGAACTTTACATGGACATCAC |
| Mouse *TBP* | CCTTCACCAATGACTCCTA | CAAGATTCACGGTAGATACAAT |
| Mouse *β-actin* | AGCCATGTACGTAGCCATCC | GCTGTGGTGGTGAAGCTGTA |
| Rat *Mt2* | CACGCTCCTAGAACTCTG | AGGTGCATTTGCATTGTT |
| Rat *β-actin* | GTCATCACTATCGGCAATG | GTGTTGGCATAGAGGTCT |
